# Supplementary material
Source: Elsevier journal article supplement (https://www.sciencedirect.com/science/article/pii/S1578219014001541)
Supplement: mmc1 [file S1578219014001541:mmc1.doc]

Anexo
